# Supplementary material
Source: MDPI journal article supplement (https://www.mdpi.com/2306-5338/9/10/181)
Supplement: s1 [file s1]

Table S2. Input data for total solids obtained from Station #01358000. This file is used as an input data file in the R script. Please see the instructions in the R script on how to format the data.

| Date       | Total Solid (mg/L) |
|------------|--------------------|
| 3/29/1971  | 173                |
| 4/26/1971  | 116                |
| 5/17/1971  | 102                |
| 6/22/1971  | 151                |
| 7/20/1971  | 150                |
| 8/25/1971  | 103                |
| 9/23/1971  | 155                |
| 10/21/1971 | 117                |
| 11/23/1971 | 141                |
| 12/21/1971 | 128                |
| 1/19/1972  | 168                |
| 2/23/1972  | 131                |
| 3/22/1972  | 136                |
| 4/19/1972  | 207                |
| 5/23/1972  | 109                |
| 6/15/1972  | 145                |
| 7/25/1972  | 134                |
| 9/21/1972  | 114                |
| 10/26/1972 | 117                |
| 11/21/1972 | 126                |
| 12/19/1972 | 92                 |
| 1/16/1973  | 146                |
| 2/20/1973  | 80                 |
| 3/23/1973  | 85                 |
| 4/24/1973  | 80                 |
| 5/22/1973  | 137                |
| 6/18/1973  | 127                |
| 7/24/1973  | 104                |
| 8/22/1973  | 116                |
| 9/18/1973  | 109                |
| 11/14/1973 | 134                |
| 12/18/1973 | 125                |
| 1/24/1974  | 95                 |
| 2/20/1974  | 75                 |
| 3/22/1974  | 120                |
| 4/25/1974  | 129                |
| 5/24/1974  | 121                |
| 6/20/1974  | 119                |

|            |     |
|------------|-----|
| 7/17/1974  | 131 |
| 8/8/1974   | 108 |
| 9/5/1974   | 165 |
| 10/11/1974 | 116 |
| 11/11/1974 | 115 |
| 12/3/1974  | 101 |
| 1/7/1975   | 100 |
| 2/11/1975  | 79  |
| 3/7/1975   | 84  |
| 4/2/1975   | 103 |
| 5/6/1975   | 88  |
