# Supplementary material
Source: MDPI journal article supplement (https://www.mdpi.com/2306-5338/9/10/181)
Supplement: s1 [file s1]

Table S1. Input data for stream discharges obtained from Station #01358000. This file is used as an input data file in the R script. Please see the instructions in the R script on how to format the data.

| Date      | Flow (m3/s) |
|-----------|-------------|
| 3/1/1971  | 832.5152724 |
| 3/2/1971  | 809.8617956 |
| 3/3/1971  | 733.4063114 |
| 3/4/1971  | 637.129035  |
| 3/5/1971  | 543.6834432 |
| 3/6/1971  | 506.8715434 |
| 3/7/1971  | 492.7131204 |
| 3/8/1971  | 504.0398588 |
| 3/9/1971  | 512.5349126 |
| 3/10/1971 | 487.0497512 |
| 3/11/1971 | 470.0596436 |
| 3/12/1971 | 464.3962744 |
| 3/13/1971 | 413.4259516 |
| 3/14/1971 | 351.1288904 |
| 3/15/1971 | 407.7625824 |
| 3/16/1971 | 889.1489644 |
| 3/17/1971 | 1163.822371 |
| 3/18/1971 | 940.1192872 |
| 3/19/1971 | 790.0400034 |
| 3/20/1971 | 719.2478884 |
| 3/21/1971 | 603.1488198 |
| 3/22/1971 | 535.1883894 |
| 3/23/1971 | 535.1883894 |
| 3/24/1971 | 470.0596436 |
| 3/25/1971 | 382.277421  |
| 3/26/1971 | 407.7625824 |
| 3/27/1971 | 359.6239442 |
| 3/28/1971 | 351.1288904 |
| 3/29/1971 | 387.9407902 |
| 3/30/1971 | 492.7131204 |
| 3/31/1971 | 552.178497  |
| 4/1/1971  | 543.6834432 |
| 4/2/1971  | 628.6339812 |
| 4/3/1971  | 957.1093948 |
| 4/4/1971  | 1166.654055 |
| 4/5/1971  | 1053.386671 |
| 4/6/1971  | 979.7628716 |
| 4/7/1971  | 889.1489644 |
| 4/8/1971  | 931.6242334 |

|           |             |
|-----------|-------------|
| 4/9/1971  | 770.2182112 |
| 4/10/1971 | 1005.248033 |
| 4/11/1971 | 1078.871833 |
| 4/12/1971 | 1118.515417 |
| 4/13/1971 | 1240.277855 |
| 4/14/1971 | 1679.188968 |
| 4/15/1971 | 1605.565168 |
| 4/16/1971 | 1350.713554 |
| 4/17/1971 | 1070.376779 |
| 4/18/1971 | 979.7628716 |
| 4/19/1971 | 1101.525309 |
| 4/20/1971 | 1257.267962 |
| 4/21/1971 | 1376.198716 |
| 4/22/1971 | 1333.723447 |
| 4/23/1971 | 1078.871833 |
| 4/24/1971 | 1008.079718 |
| 4/25/1971 | 948.614341  |
| 4/26/1971 | 948.614341  |
| 4/27/1971 | 843.8420108 |
| 4/28/1971 | 809.8617956 |
| 4/29/1971 | 894.8123336 |
| 4/30/1971 | 1013.743087 |
| 5/1/1971  | 982.5945562 |
| 5/2/1971  | 923.1291796 |
| 5/3/1971  | 1121.347102 |
| 5/4/1971  | 1682.020652 |
| 5/5/1971  | 1690.515706 |
| 5/6/1971  | 1424.337354 |
| 5/7/1971  | 1333.723447 |
| 5/8/1971  | 1237.44617  |
| 5/9/1971  | 1379.0304   |
| 5/10/1971 | 1625.38696  |
| 5/11/1971 | 1410.178931 |
| 5/12/1971 | 1427.169038 |
| 5/13/1971 | 1455.485884 |
| 5/14/1971 | 1557.42653  |
| 5/15/1971 | 1254.436278 |
| 5/16/1971 | 1019.406456 |
| 5/17/1971 | 988.2579254 |
| 5/18/1971 | 877.822226  |
| 5/19/1971 | 787.2083188 |
| 5/20/1971 | 713.5845192 |
| 5/21/1971 | 645.6240888 |

|           |             |
|-----------|-------------|
| 5/22/1971 | 736.237996  |
| 5/23/1971 | 719.2478884 |
| 5/24/1971 | 631.4656658 |
| 5/25/1971 | 501.2081742 |
| 5/26/1971 | 543.6834432 |
| 5/27/1971 | 577.6636584 |
| 5/28/1971 | 538.020074  |
| 5/29/1971 | 399.2675286 |
| 5/30/1971 | 396.435844  |
| 5/31/1971 | 353.960575  |
| 6/1/1971  | 351.1288904 |
| 6/2/1971  | 300.1585676 |
| 6/3/1971  | 286.0001446 |
| 6/4/1971  | 294.4951984 |
| 6/5/1971  | 243.8080441 |
| 6/6/1971  | 239.2773487 |
| 6/7/1971  | 223.4199149 |
| 6/8/1971  | 252.5862663 |
| 6/9/1971  | 267.0278578 |
| 6/10/1971 | 248.3387394 |
| 6/11/1971 | 216.6238719 |
| 6/12/1971 | 143.8495777 |
| 6/13/1971 | 129.1248178 |
| 6/14/1971 | 156.5921584 |
| 6/15/1971 | 216.9070404 |
| 6/16/1971 | 223.1367465 |
| 6/17/1971 | 204.4476281 |
| 6/18/1971 | 204.7307966 |
| 6/19/1971 | 127.425807  |
| 6/20/1971 | 84.10103262 |
| 6/21/1971 | 157.7248322 |
| 6/22/1971 | 197.9347535 |
| 6/23/1971 | 216.057535  |
| 6/24/1971 | 204.7307966 |
| 6/25/1971 | 224.5525888 |
| 6/26/1971 | 154.8931476 |
| 6/27/1971 | 157.1584953 |
| 6/28/1971 | 157.7248322 |
| 6/29/1971 | 154.0436422 |
| 6/30/1971 | 192.5545528 |
| 7/1/1971  | 179.5288036 |
| 7/2/1971  | 229.3664526 |
| 7/3/1971  | 221.4377357 |

|           |             |
|-----------|-------------|
| 7/4/1971  | 149.2297784 |
| 7/5/1971  | 61.16438736 |
| 7/6/1971  | 126.2931332 |
| 7/7/1971  | 176.697119  |
| 7/8/1971  | 184.3426675 |
| 7/9/1971  | 178.6792983 |
| 7/10/1971 | 114.6832263 |
| 7/11/1971 | 80.13667418 |
| 7/12/1971 | 93.4455918  |
| 7/13/1971 | 145.5485884 |
| 7/14/1971 | 186.6080151 |
| 7/15/1971 | 174.7149398 |
| 7/16/1971 | 188.8733628 |
| 7/17/1971 | 131.3901654 |
| 7/18/1971 | 97.40995024 |
| 7/19/1971 | 146.1149254 |
| 7/20/1971 | 273.5407324 |
| 7/21/1971 | 264.7625101 |
| 7/22/1971 | 213.7921873 |
| 7/23/1971 | 182.6436567 |
| 7/24/1971 | 115.2495632 |
| 7/25/1971 | 107.0376779 |
| 7/26/1971 | 145.8317569 |
| 7/27/1971 | 212.376345  |
| 7/28/1971 | 257.9664671 |
| 7/29/1971 | 238.1446749 |
| 7/30/1971 | 305.8219368 |
| 7/31/1971 | 288.8318292 |
| 8/1/1971  | 365.2873134 |
| 8/2/1971  | 311.485306  |
| 8/3/1971  | 331.3070982 |
| 8/4/1971  | 368.118998  |
| 8/5/1971  | 424.75269   |
| 8/6/1971  | 385.1091056 |
| 8/7/1971  | 251.4535925 |
| 8/8/1971  | 187.740689  |
| 8/9/1971  | 208.4119866 |
| 8/10/1971 | 216.3407034 |
| 8/11/1971 | 176.9802875 |
| 8/12/1971 | 205.013965  |
| 8/13/1971 | 220.3050619 |
| 8/14/1971 | 146.1149254 |
| 8/15/1971 | 99.95846638 |

|           |             |
|-----------|-------------|
| 8/16/1971 | 131.9565024 |
| 8/17/1971 | 191.7050474 |
| 8/18/1971 | 182.6436567 |
| 8/19/1971 | 205.580302  |
| 8/20/1971 | 196.2357428 |
| 8/21/1971 | 127.7089755 |
| 8/22/1971 | 115.8159001 |
| 8/23/1971 | 135.6376923 |
| 8/24/1971 | 190.5723736 |
| 8/25/1971 | 196.8020797 |
| 8/26/1971 | 171.8832552 |
| 8/27/1971 | 184.6258359 |
| 8/28/1971 | 455.9012206 |
| 8/29/1971 | 614.4755582 |
| 8/30/1971 | 441.7427976 |
| 8/31/1971 | 396.435844  |
| 9/1/1971  | 331.3070982 |
| 9/2/1971  | 317.1486752 |
| 9/3/1971  | 279.7704385 |
| 9/4/1971  | 191.9882159 |
| 9/5/1971  | 162.538696  |
| 9/6/1971  | 110.4356994 |
| 9/7/1971  | 169.0515706 |
| 9/8/1971  | 248.055571  |
| 9/9/1971  | 241.2595279 |
| 9/10/1971 | 239.8436856 |
| 9/11/1971 | 171.6000868 |
| 9/12/1971 | 165.6535491 |
| 9/13/1971 | 178.3961298 |
| 9/14/1971 | 297.326883  |
| 9/15/1971 | 345.4655212 |
| 9/16/1971 | 351.1288904 |
| 9/17/1971 | 342.6338366 |
| 9/18/1971 | 258.2496355 |
| 9/19/1971 | 186.8911836 |
| 9/20/1971 | 191.421879  |
| 9/21/1971 | 382.277421  |
| 9/22/1971 | 450.2378514 |
| 9/23/1971 | 410.594267  |
| 9/24/1971 | 376.6140518 |
| 9/25/1971 | 276.372417  |
| 9/26/1971 | 240.693191  |
| 9/27/1971 | 225.9684311 |

|            |             |
|------------|-------------|
| 9/28/1971  | 254.0021086 |
| 9/29/1971  | 261.0813201 |
| 9/30/1971  | 255.1347825 |
| 10/1/1971  | 249.1882448 |
| 10/2/1971  | 197.6515851 |
| 10/3/1971  | 105.905004  |
| 10/4/1971  | 190.855542  |
| 10/5/1971  | 220.8713988 |
| 10/6/1971  | 212.9426819 |
| 10/7/1971  | 231.6318003 |
| 10/8/1971  | 228.5169472 |
| 10/9/1971  | 182.6436567 |
| 10/10/1971 | 181.5109829 |
| 10/11/1971 | 264.1961732 |
| 10/12/1971 | 336.9704674 |
| 10/13/1971 | 308.6536214 |
| 10/14/1971 | 300.1585676 |
| 10/15/1971 | 291.6635138 |
| 10/16/1971 | 218.3228827 |
| 10/17/1971 | 192.2713843 |
| 10/18/1971 | 187.740689  |
| 10/19/1971 | 236.1624956 |
| 10/20/1971 | 256.2674563 |
| 10/21/1971 | 246.9228971 |
| 10/22/1971 | 222.853578  |
| 10/23/1971 | 180.0951406 |
| 10/24/1971 | 155.4594845 |
| 10/25/1971 | 139.6020508 |
| 10/26/1971 | 230.4991264 |
| 10/27/1971 | 252.8694348 |
| 10/28/1971 | 259.9486463 |
| 10/29/1971 | 260.5149832 |
| 10/30/1971 | 170.4674129 |
| 10/31/1971 | 143.2832408 |
| 11/1/1971  | 193.1208897 |
| 11/2/1971  | 213.5090188 |
| 11/3/1971  | 228.2337788 |
| 11/4/1971  | 255.4179509 |
| 11/5/1971  | 255.4179509 |
| 11/6/1971  | 177.5466244 |
| 11/7/1971  | 182.3604882 |
| 11/8/1971  | 115.2495632 |
| 11/9/1971  | 249.1882448 |

|            |             |
|------------|-------------|
| 11/10/1971 | 252.5862663 |
| 11/11/1971 | 250.8872556 |
| 11/12/1971 | 252.0199294 |
| 11/13/1971 | 243.5248756 |
| 11/14/1971 | 182.9268252 |
| 11/15/1971 | 201.3327751 |
| 11/16/1971 | 176.4139506 |
| 11/17/1971 | 192.2713843 |
| 11/18/1971 | 149.2297784 |
| 11/19/1971 | 156.5921584 |
| 11/20/1971 | 146.6812623 |
| 11/21/1971 | 133.6555131 |
| 11/22/1971 | 184.9090044 |
| 11/23/1971 | 219.172388  |
| 11/24/1971 | 254.5684455 |
| 11/25/1971 | 216.6238719 |
| 11/26/1971 | 216.3407034 |
| 11/27/1971 | 207.5624812 |
| 11/28/1971 | 208.695155  |
| 11/29/1971 | 200.7664381 |
| 11/30/1971 | 276.9387539 |
| 12/1/1971  | 362.4556288 |
| 12/2/1971  | 278.0714277 |
| 12/3/1971  | 237.5783379 |
| 12/4/1971  | 206.9961443 |
| 12/5/1971  | 203.0317858 |
| 12/6/1971  | 238.7110118 |
| 12/7/1971  | 419.0893208 |
| 12/8/1971  | 710.7528346 |
| 12/9/1971  | 583.3270276 |
| 12/10/1971 | 608.812189  |
| 12/11/1971 | 897.6440182 |
| 12/12/1971 | 991.08961   |
| 12/13/1971 | 673.9409348 |
| 12/14/1971 | 540.8517586 |
| 12/15/1971 | 538.020074  |
| 12/16/1971 | 744.7330498 |
| 12/17/1971 | 824.0202186 |
| 12/18/1971 | 682.4359886 |
| 12/19/1971 | 518.1982818 |
| 12/20/1971 | 427.5843746 |
| 12/21/1971 | 427.5843746 |
| 12/22/1971 | 427.5843746 |

|            |             |
|------------|-------------|
| 12/23/1971 | 277.5050908 |
| 12/24/1971 | 221.1545673 |
| 12/25/1971 | 319.9803598 |
| 12/26/1971 | 345.4655212 |
| 12/27/1971 | 353.960575  |
| 12/28/1971 | 424.75269   |
| 12/29/1971 | 518.1982818 |
| 12/30/1971 | 495.544805  |
| 12/31/1971 | 421.9210054 |
| 1/1/1972   | 356.7922596 |
| 1/2/1972   | 356.7922596 |
| 1/3/1972   | 325.643729  |
| 1/4/1972   | 404.9308978 |
| 1/5/1972   | 345.4655212 |
| 1/6/1972   | 351.1288904 |
| 1/7/1972   | 286.0001446 |
| 1/8/1972   | 272.9743954 |
| 1/9/1972   | 286.0001446 |
| 1/10/1972  | 254.2852771 |
| 1/11/1972  | 376.6140518 |
| 1/12/1972  | 427.5843746 |
| 1/13/1972  | 475.7230128 |
| 1/14/1972  | 546.5151278 |
| 1/15/1972  | 546.5151278 |
| 1/16/1972  | 393.6041594 |
| 1/17/1972  | 270.7090478 |
| 1/18/1972  | 336.9704674 |
| 1/19/1972  | 362.4556288 |
| 1/20/1972  | 399.2675286 |
| 1/21/1972  | 382.277421  |
| 1/22/1972  | 353.960575  |
| 1/23/1972  | 336.9704674 |
| 1/24/1972  | 419.0893208 |
| 1/25/1972  | 450.2378514 |
| 1/26/1972  | 569.1686046 |
| 1/27/1972  | 450.2378514 |
| 1/28/1972  | 396.435844  |
| 1/29/1972  | 376.6140518 |
| 1/30/1972  | 353.960575  |
| 1/31/1972  | 308.6536214 |
| 2/1/1972   | 314.3169906 |
| 2/2/1972   | 314.3169906 |
| 2/3/1972   | 302.9902522 |



|           |             |
|-----------|-------------|
| 2/4/1972  | 328.4754136 |
| 2/5/1972  | 302.9902522 |
| 2/6/1972  | 291.6635138 |
| 2/7/1972  | 283.16846   |
| 2/8/1972  | 300.1585676 |
| 2/9/1972  | 294.4951984 |
| 2/10/1972 | 297.326883  |
| 2/11/1972 | 274.3902377 |
| 2/12/1972 | 275.5229116 |
| 2/13/1972 | 270.1427108 |
| 2/14/1972 | 308.6536214 |
| 2/15/1972 | 404.9308978 |
| 2/16/1972 | 419.0893208 |
| 2/17/1972 | 407.7625824 |
| 2/18/1972 | 342.6338366 |
| 2/19/1972 | 331.3070982 |
| 2/20/1972 | 282.0357862 |
| 2/21/1972 | 266.1783524 |
| 2/22/1972 | 283.16846   |
| 2/23/1972 | 294.4951984 |
| 2/24/1972 | 288.8318292 |
| 2/25/1972 | 288.8318292 |
| 2/26/1972 | 300.1585676 |
| 2/27/1972 | 300.1585676 |
| 2/28/1972 | 300.1585676 |
| 2/29/1972 | 305.8219368 |
| 3/1/1972  | 319.9803598 |
| 3/2/1972  | 399.2675286 |
| 3/3/1972  | 1019.406456 |
| 3/4/1972  | 1107.188679 |
| 3/5/1972  | 801.3667418 |
| 3/6/1972  | 654.1191426 |
| 3/7/1972  | 569.1686046 |
| 3/8/1972  | 591.8220814 |
| 3/9/1972  | 586.1587122 |
| 3/10/1972 | 532.3567048 |
| 3/11/1972 | 489.8814358 |
| 3/12/1972 | 475.7230128 |
| 3/13/1972 | 472.8913282 |
| 3/14/1972 | 487.0497512 |
| 3/15/1972 | 484.2180666 |
| 3/16/1972 | 501.2081742 |
| 3/17/1972 | 662.6141964 |

|           |             |
|-----------|-------------|
| 3/18/1972 | 1379.0304   |
| 3/19/1972 | 1316.733339 |
| 3/20/1972 | 982.5945562 |
| 3/21/1972 | 804.1984264 |
| 3/22/1972 | 849.50538   |
| 3/23/1972 | 1396.020508 |
| 3/24/1972 | 1302.574916 |
| 3/25/1972 | 1010.911402 |
| 3/26/1972 | 863.663803  |
| 3/27/1972 | 741.9013652 |
| 3/28/1972 | 654.1191426 |
| 3/29/1972 | 651.287458  |
| 3/30/1972 | 713.5845192 |
| 3/31/1972 | 758.8914728 |
| 4/1/1972  | 838.1786416 |
| 4/2/1972  | 982.5945562 |
| 4/3/1972  | 917.4658104 |
| 4/4/1972  | 869.3271722 |
| 4/5/1972  | 699.4260962 |
| 4/6/1972  | 600.3171352 |
| 4/7/1972  | 529.5250202 |
| 4/8/1972  | 557.8418662 |
| 4/9/1972  | 521.0299664 |
| 4/10/1972 | 526.6933356 |
| 4/11/1972 | 566.33692   |
| 4/12/1972 | 634.2973504 |
| 4/13/1972 | 869.3271722 |
| 4/14/1972 | 1353.545239 |
| 4/15/1972 | 1220.456063 |
| 4/16/1972 | 1115.683732 |
| 4/17/1972 | 1430.000723 |
| 4/18/1972 | 1687.684022 |
| 4/19/1972 | 1602.733484 |
| 4/20/1972 | 1863.248467 |
| 4/21/1972 | 2262.515995 |
| 4/22/1972 | 1659.367176 |
| 4/23/1972 | 1622.555276 |
| 4/24/1972 | 1509.287892 |
| 4/25/1972 | 1316.733339 |
| 4/26/1972 | 1118.515417 |
| 4/27/1972 | 931.6242334 |
| 4/28/1972 | 818.3568494 |
| 4/29/1972 | 790.0400034 |

|           |             |
|-----------|-------------|
| 4/30/1972 | 835.346957  |
| 5/1/1972  | 809.8617956 |
| 5/2/1972  | 1002.416348 |
| 5/3/1972  | 1390.357139 |
| 5/4/1972  | 2225.704096 |
| 5/5/1972  | 2675.941947 |
| 5/6/1972  | 2152.080296 |
| 5/7/1972  | 1744.317714 |
| 5/8/1972  | 1608.396853 |
| 5/9/1972  | 1979.347535 |
| 5/10/1972 | 1917.050474 |
| 5/11/1972 | 1540.436422 |
| 5/12/1972 | 1291.248178 |
| 5/13/1972 | 1084.535202 |
| 5/14/1972 | 948.614341  |
| 5/15/1972 | 1025.069825 |
| 5/16/1972 | 1115.683732 |
| 5/17/1972 | 1421.505669 |
| 5/18/1972 | 1362.040293 |
| 5/19/1972 | 1180.812478 |
| 5/20/1972 | 1025.069825 |
| 5/21/1972 | 971.2678178 |
| 5/22/1972 | 897.6440182 |
| 5/23/1972 | 778.713265  |
| 5/24/1972 | 656.9508272 |
| 5/25/1972 | 566.33692   |
| 5/26/1972 | 478.5546974 |
| 5/27/1972 | 407.7625824 |
| 5/28/1972 | 382.277421  |
| 5/29/1972 | 317.1486752 |
| 5/30/1972 | 282.8852915 |
| 5/31/1972 | 331.3070982 |
| 6/1/1972  | 478.5546974 |
| 6/2/1972  | 730.5746268 |
| 6/3/1972  | 608.812189  |
| 6/4/1972  | 705.0894654 |
| 6/5/1972  | 959.9410794 |
| 6/6/1972  | 713.5845192 |
| 6/7/1972  | 563.5052354 |
| 6/8/1972  | 512.5349126 |
| 6/9/1972  | 736.237996  |
| 6/10/1972 | 843.8420108 |
| 6/11/1972 | 654.1191426 |

|           |             |
|-----------|-------------|
| 6/12/1972 | 492.7131204 |
| 6/13/1972 | 467.227959  |
| 6/14/1972 | 413.4259516 |
| 6/15/1972 | 376.6140518 |
| 6/16/1972 | 509.703228  |
| 6/17/1972 | 651.287458  |
| 6/18/1972 | 543.6834432 |
| 6/19/1972 | 509.703228  |
| 6/20/1972 | 464.3962744 |
| 6/21/1972 | 492.7131204 |
| 6/22/1972 | 948.614341  |
| 6/23/1972 | 1531.941369 |
| 6/24/1972 | 2234.199149 |
| 6/25/1972 | 1925.545528 |
| 6/26/1972 | 1670.693914 |
| 6/27/1972 | 1322.396708 |
| 6/28/1972 | 1104.356994 |
| 6/29/1972 | 866.4954876 |
| 6/30/1972 | 1138.337209 |
| 7/1/1972  | 1500.792838 |
| 7/2/1972  | 1211.961009 |
| 7/3/1972  | 996.7529792 |
| 7/4/1972  | 1081.703517 |
| 7/5/1972  | 999.5846638 |
| 7/6/1972  | 787.2083188 |
| 7/7/1972  | 707.92115   |
| 7/8/1972  | 583.3270276 |
| 7/9/1972  | 509.703228  |
| 7/10/1972 | 492.7131204 |
| 7/11/1972 | 489.8814358 |
| 7/12/1972 | 495.544805  |
| 7/13/1972 | 487.0497512 |
| 7/14/1972 | 410.594267  |
| 7/15/1972 | 376.6140518 |
| 7/16/1972 | 342.6338366 |
| 7/17/1972 | 402.0992132 |
| 7/18/1972 | 356.7922596 |
| 7/19/1972 | 351.1288904 |
| 7/20/1972 | 373.7823672 |
| 7/21/1972 | 286.0001446 |
| 7/22/1972 | 257.4001301 |
| 7/23/1972 | 278.3545962 |
| 7/24/1972 | 288.8318292 |

|           |             |
|-----------|-------------|
| 7/25/1972 | 353.960575  |
| 7/26/1972 | 339.802152  |
| 7/27/1972 | 283.16846   |
| 7/28/1972 | 283.16846   |
| 7/29/1972 | 274.1070693 |
| 7/30/1972 | 269.8595424 |
| 7/31/1972 | 261.0813201 |
| 8/1/1972  | 231.6318003 |
| 8/2/1972  | 203.0317858 |
| 8/3/1972  | 243.5248756 |
| 8/4/1972  | 269.8595424 |
| 8/5/1972  | 246.9228971 |
| 8/6/1972  | 223.1367465 |
| 8/7/1972  | 176.9802875 |
| 8/8/1972  | 228.8001157 |
| 8/9/1972  | 317.1486752 |
| 8/10/1972 | 317.1486752 |
| 8/11/1972 | 233.0476426 |
| 8/12/1972 | 218.6060511 |
| 8/13/1972 | 202.1822804 |
| 8/14/1972 | 160.8396853 |
| 8/15/1972 | 262.4971624 |
| 8/16/1972 | 278.0714277 |
| 8/17/1972 | 252.0199294 |
| 8/18/1972 | 218.3228827 |
| 8/19/1972 | 211.8100081 |
| 8/20/1972 | 203.0317858 |
| 8/21/1972 | 174.7149398 |
| 8/22/1972 | 204.4476281 |
| 8/23/1972 | 195.3862374 |
| 8/24/1972 | 163.9545383 |
| 8/25/1972 | 197.6515851 |
| 8/26/1972 | 137.6198716 |
| 8/27/1972 | 131.9565024 |
| 8/28/1972 | 159.1406745 |
| 8/29/1972 | 213.5090188 |
| 8/30/1972 | 207.2793127 |
| 8/31/1972 | 201.3327751 |
| 9/1/1972  | 140.4515562 |
| 9/2/1972  | 152.6277999 |
| 9/3/1972  | 138.7525454 |
| 9/4/1972  | 116.3822371 |
| 9/5/1972  | 171.8832552 |

|            |             |
|------------|-------------|
| 9/6/1972   | 195.6694059 |
| 9/7/1972   | 195.6694059 |
| 9/8/1972   | 178.3961298 |
| 9/9/1972   | 156.0258215 |
| 9/10/1972  | 136.4871977 |
| 9/11/1972  | 161.9723591 |
| 9/12/1972  | 159.7070114 |
| 9/13/1972  | 159.7070114 |
| 9/14/1972  | 206.1466389 |
| 9/15/1972  | 263.9130047 |
| 9/16/1972  | 256.8337932 |
| 9/17/1972  | 173.0159291 |
| 9/18/1972  | 144.4159146 |
| 9/19/1972  | 192.5545528 |
| 9/20/1972  | 205.013965  |
| 9/21/1972  | 204.7307966 |
| 9/22/1972  | 223.1367465 |
| 9/23/1972  | 177.263456  |
| 9/24/1972  | 136.2040293 |
| 9/25/1972  | 153.4773053 |
| 9/26/1972  | 197.3684166 |
| 9/27/1972  | 173.582266  |
| 9/28/1972  | 247.2060656 |
| 9/29/1972  | 173.8654344 |
| 9/30/1972  | 166.7862229 |
| 10/1/1972  | 166.7862229 |
| 10/2/1972  | 166.5030545 |
| 10/3/1972  | 170.7505814 |
| 10/4/1972  | 212.9426819 |
| 10/5/1972  | 202.4654489 |
| 10/6/1972  | 199.3505958 |
| 10/7/1972  | 235.0298218 |
| 10/8/1972  | 390.7724748 |
| 10/9/1972  | 261.0813201 |
| 10/10/1972 | 228.5169472 |
| 10/11/1972 | 221.4377357 |
| 10/12/1972 | 216.9070404 |
| 10/13/1972 | 186.0416782 |
| 10/14/1972 | 195.9525743 |
| 10/15/1972 | 191.9882159 |
| 10/16/1972 | 146.9644307 |
| 10/17/1972 | 211.8100081 |
| 10/18/1972 | 192.5545528 |

|            |             |
|------------|-------------|
| 10/19/1972 | 184.6258359 |
| 10/20/1972 | 201.0496066 |
| 10/21/1972 | 167.0693914 |
| 10/22/1972 | 145.5485884 |
| 10/23/1972 | 125.7267962 |
| 10/24/1972 | 203.5981227 |
| 10/25/1972 | 207.2793127 |
| 10/26/1972 | 215.2080296 |
| 10/27/1972 | 191.1387105 |
| 10/28/1972 | 179.5288036 |
| 10/29/1972 | 169.901076  |
| 10/30/1972 | 280.6199439 |
| 10/31/1972 | 331.3070982 |
| 11/1/1972  | 311.485306  |
| 11/2/1972  | 279.48727   |
| 11/3/1972  | 555.0101816 |
| 11/4/1972  | 526.6933356 |
| 11/5/1972  | 478.5546974 |
| 11/6/1972  | 441.7427976 |
| 11/7/1972  | 410.594267  |
| 11/8/1972  | 501.2081742 |
| 11/9/1972  | 1659.367176 |
| 11/10/1972 | 1744.317714 |
| 11/11/1972 | 1008.079718 |
| 11/12/1972 | 897.6440182 |
| 11/13/1972 | 690.9310424 |
| 11/14/1972 | 702.2577808 |
| 11/15/1972 | 920.297495  |
| 11/16/1972 | 730.5746268 |
| 11/17/1972 | 639.9607196 |
| 11/18/1972 | 555.0101816 |
| 11/19/1972 | 492.7131204 |
| 11/20/1972 | 659.7825118 |
| 11/21/1972 | 838.1786416 |
| 11/22/1972 | 608.812189  |
| 11/23/1972 | 504.0398588 |
| 11/24/1972 | 475.7230128 |
| 11/25/1972 | 438.911113  |
| 11/26/1972 | 761.7231574 |
| 11/27/1972 | 1514.951261 |
| 11/28/1972 | 1081.703517 |
| 11/29/1972 | 1002.416348 |
| 11/30/1972 | 784.3766342 |

|            |             |
|------------|-------------|
| 12/1/1972  | 713.5845192 |
| 12/2/1972  | 637.129035  |
| 12/3/1972  | 620.1389274 |
| 12/4/1972  | 583.3270276 |
| 12/5/1972  | 563.5052354 |
| 12/6/1972  | 662.6141964 |
| 12/7/1972  | 1837.763305 |
| 12/8/1972  | 1308.238285 |
| 12/9/1972  | 1121.347102 |
| 12/10/1972 | 1127.010471 |
| 12/11/1972 | 1081.703517 |
| 12/12/1972 | 914.6341258 |
| 12/13/1972 | 852.3370646 |
| 12/14/1972 | 923.1291796 |
| 12/15/1972 | 841.0103262 |
| 12/16/1972 | 710.7528346 |
| 12/17/1972 | 569.1686046 |
| 12/18/1972 | 501.2081742 |
| 12/19/1972 | 557.8418662 |
| 12/20/1972 | 563.5052354 |
| 12/21/1972 | 535.1883894 |
| 12/22/1972 | 563.5052354 |
| 12/23/1972 | 722.079573  |
| 12/24/1972 | 764.554842  |
| 12/25/1972 | 696.5944116 |
| 12/26/1972 | 685.2676732 |
| 12/27/1972 | 707.92115   |
| 12/28/1972 | 673.9409348 |
| 12/29/1972 | 597.4854506 |
| 12/30/1972 | 538.020074  |
| 12/31/1972 | 535.1883894 |
| 1/1/1973   | 1444.159146 |
| 1/2/1973   | 1840.59499  |
| 1/3/1973   | 1370.535346 |
| 1/4/1973   | 1098.693625 |
| 1/5/1973   | 920.297495  |
| 1/6/1973   | 804.1984264 |
| 1/7/1973   | 574.8319738 |
| 1/8/1973   | 478.5546974 |
| 1/9/1973   | 427.5843746 |
| 1/10/1973  | 438.911113  |
| 1/11/1973  | 447.4061668 |
| 1/12/1973  | 450.2378514 |



|           |             |
|-----------|-------------|
| 1/13/1973 | 436.0794284 |
| 1/14/1973 | 410.594267  |
| 1/15/1973 | 407.7625824 |
| 1/16/1973 | 424.75269   |
| 1/17/1973 | 430.4160592 |
| 1/18/1973 | 424.75269   |
| 1/19/1973 | 484.2180666 |
| 1/20/1973 | 874.9905414 |
| 1/21/1973 | 962.772764  |
| 1/22/1973 | 679.604304  |
| 1/23/1973 | 841.0103262 |
| 1/24/1973 | 1200.63427  |
| 1/25/1973 | 1044.891617 |
| 1/26/1973 | 858.0004338 |
| 1/27/1973 | 784.3766342 |
| 1/28/1973 | 705.0894654 |
| 1/29/1973 | 668.2775656 |
| 1/30/1973 | 521.0299664 |
| 1/31/1973 | 555.0101816 |
| 2/1/1973  | 470.0596436 |
| 2/2/1973  | 475.7230128 |
| 2/3/1973  | 1144.000578 |
| 2/4/1973  | 1435.664092 |
| 2/5/1973  | 1115.683732 |
| 2/6/1973  | 945.7826564 |
| 2/7/1973  | 770.2182112 |
| 2/8/1973  | 713.5845192 |
| 2/9/1973  | 662.6141964 |
| 2/10/1973 | 557.8418662 |
| 2/11/1973 | 557.8418662 |
| 2/12/1973 | 540.8517586 |
| 2/13/1973 | 475.7230128 |
| 2/14/1973 | 475.7230128 |
| 2/15/1973 | 492.7131204 |
| 2/16/1973 | 458.7329052 |
| 2/17/1973 | 430.4160592 |
| 2/18/1973 | 396.435844  |
| 2/19/1973 | 407.7625824 |
| 2/20/1973 | 419.0893208 |
| 2/21/1973 | 436.0794284 |
| 2/22/1973 | 458.7329052 |
| 2/23/1973 | 489.8814358 |
| 2/24/1973 | 464.3962744 |

|           |             |
|-----------|-------------|
| 2/25/1973 | 387.9407902 |
| 2/26/1973 | 362.4556288 |
| 2/27/1973 | 353.960575  |
| 2/28/1973 | 325.643729  |
| 3/1/1973  | 331.3070982 |
| 3/2/1973  | 351.1288904 |
| 3/3/1973  | 385.1091056 |
| 3/4/1973  | 492.7131204 |
| 3/5/1973  | 705.0894654 |
| 3/6/1973  | 807.030111  |
| 3/7/1973  | 716.4162038 |
| 3/8/1973  | 931.6242334 |
| 3/9/1973  | 1305.406601 |
| 3/10/1973 | 1124.178786 |
| 3/11/1973 | 900.4757028 |
| 3/12/1973 | 804.1984264 |
| 3/13/1973 | 993.9212946 |
| 3/14/1973 | 1022.238141 |
| 3/15/1973 | 880.6539106 |
| 3/16/1973 | 858.0004338 |
| 3/17/1973 | 999.5846638 |
| 3/18/1973 | 1843.426675 |
| 3/19/1973 | 1721.664237 |
| 3/20/1973 | 1274.25807  |
| 3/21/1973 | 1002.416348 |
| 3/22/1973 | 832.5152724 |
| 3/23/1973 | 724.9112576 |
| 3/24/1973 | 614.4755582 |
| 3/25/1973 | 563.5052354 |
| 3/26/1973 | 634.2973504 |
| 3/27/1973 | 713.5845192 |
| 3/28/1973 | 648.4557734 |
| 3/29/1973 | 588.9903968 |
| 3/30/1973 | 538.020074  |
| 3/31/1973 | 509.703228  |
| 4/1/1973  | 546.5151278 |
| 4/2/1973  | 1325.228393 |
| 4/3/1973  | 1999.169328 |
| 4/4/1973  | 1701.842445 |
| 4/5/1973  | 2324.813057 |
| 4/6/1973  | 1781.129613 |
| 4/7/1973  | 1458.317569 |
| 4/8/1973  | 1197.802586 |

|           |             |
|-----------|-------------|
| 4/9/1973  | 965.6044486 |
| 4/10/1973 | 908.9707566 |
| 4/11/1973 | 1019.406456 |
| 4/12/1973 | 923.1291796 |
| 4/13/1973 | 818.3568494 |
| 4/14/1973 | 696.5944116 |
| 4/15/1973 | 639.9607196 |
| 4/16/1973 | 583.3270276 |
| 4/17/1973 | 529.5250202 |
| 4/18/1973 | 552.178497  |
| 4/19/1973 | 572.0002892 |
| 4/20/1973 | 586.1587122 |
| 4/21/1973 | 594.653766  |
| 4/22/1973 | 543.6834432 |
| 4/23/1973 | 501.2081742 |
| 4/24/1973 | 549.3468124 |
| 4/25/1973 | 523.861651  |
| 4/26/1973 | 495.544805  |
| 4/27/1973 | 447.4061668 |
| 4/28/1973 | 450.2378514 |
| 4/29/1973 | 526.6933356 |
| 4/30/1973 | 535.1883894 |
| 5/1/1973  | 518.1982818 |
| 5/2/1973  | 419.0893208 |
| 5/3/1973  | 359.6239442 |
| 5/4/1973  | 441.7427976 |
| 5/5/1973  | 450.2378514 |
| 5/6/1973  | 438.911113  |
| 5/7/1973  | 376.6140518 |
| 5/8/1973  | 328.4754136 |
| 5/9/1973  | 322.8120444 |
| 5/10/1973 | 441.7427976 |
| 5/11/1973 | 586.1587122 |
| 5/12/1973 | 756.0597882 |
| 5/13/1973 | 727.7429422 |
| 5/14/1973 | 594.653766  |
| 5/15/1973 | 586.1587122 |
| 5/16/1973 | 588.9903968 |
| 5/17/1973 | 625.8022966 |
| 5/18/1973 | 1112.852048 |
| 5/19/1973 | 1744.317714 |
| 5/20/1973 | 1415.8423   |
| 5/21/1973 | 1645.208753 |

|           |             |
|-----------|-------------|
| 5/22/1973 | 1769.802875 |
| 5/23/1973 | 1353.545239 |
| 5/24/1973 | 1076.040148 |
| 5/25/1973 | 928.7925488 |
| 5/26/1973 | 826.8519032 |
| 5/27/1973 | 719.2478884 |
| 5/28/1973 | 716.4162038 |
| 5/29/1973 | 775.8815804 |
| 5/30/1973 | 812.6934802 |
| 5/31/1973 | 770.2182112 |
| 6/1/1973  | 642.7924042 |
| 6/2/1973  | 577.6636584 |
| 6/3/1973  | 509.703228  |
| 6/4/1973  | 464.3962744 |
| 6/5/1973  | 458.7329052 |
| 6/6/1973  | 413.4259516 |
| 6/7/1973  | 424.75269   |
| 6/8/1973  | 376.6140518 |
| 6/9/1973  | 419.0893208 |
| 6/10/1973 | 351.1288904 |
| 6/11/1973 | 297.326883  |
| 6/12/1973 | 283.16846   |
| 6/13/1973 | 359.6239442 |
| 6/14/1973 | 379.4457364 |
| 6/15/1973 | 362.4556288 |
| 6/16/1973 | 311.485306  |
| 6/17/1973 | 256.2674563 |
| 6/18/1973 | 207.5624812 |
| 6/19/1973 | 256.5506248 |
| 6/20/1973 | 268.4437001 |
| 6/21/1973 | 252.5862663 |
| 6/22/1973 | 239.8436856 |
| 6/23/1973 | 245.2238864 |
| 6/24/1973 | 262.4971624 |
| 6/25/1973 | 223.9862519 |
| 6/26/1973 | 272.1248901 |
| 6/27/1973 | 277.7882593 |
| 6/28/1973 | 224.2694203 |
| 6/29/1973 | 305.8219368 |
| 6/30/1973 | 1163.822371 |
| 7/1/1973  | 1381.862085 |
| 7/2/1973  | 764.554842  |
| 7/3/1973  | 597.4854506 |

|           |             |
|-----------|-------------|
| 7/4/1973  | 526.6933356 |
| 7/5/1973  | 444.5744822 |
| 7/6/1973  | 453.069536  |
| 7/7/1973  | 396.435844  |
| 7/8/1973  | 300.1585676 |
| 7/9/1973  | 219.4555565 |
| 7/10/1973 | 297.326883  |
| 7/11/1973 | 253.1526032 |
| 7/12/1973 | 233.6139795 |
| 7/13/1973 | 190.855542  |
| 7/14/1973 | 177.8297929 |
| 7/15/1973 | 171.0337498 |
| 7/16/1973 | 176.697119  |
| 7/17/1973 | 190.5723736 |
| 7/18/1973 | 193.1208897 |
| 7/19/1973 | 183.4931621 |
| 7/20/1973 | 204.1644597 |
| 7/21/1973 | 164.2377068 |
| 7/22/1973 | 147.2475992 |
| 7/23/1973 | 101.3743087 |
| 7/24/1973 | 141.58423   |
| 7/25/1973 | 158.0080007 |
| 7/26/1973 | 268.4437001 |
| 7/27/1973 | 163.9545383 |
| 7/28/1973 | 145.26542   |
| 7/29/1973 | 146.1149254 |
| 7/30/1973 | 159.7070114 |
| 7/31/1973 | 168.7684022 |
| 8/1/1973  | 179.5288036 |
| 8/2/1973  | 214.0753558 |
| 8/3/1973  | 208.4119866 |
| 8/4/1973  | 217.7565457 |
| 8/5/1973  | 153.7604738 |
| 8/6/1973  | 171.8832552 |
| 8/7/1973  | 188.8733628 |
| 8/8/1973  | 172.1664237 |
| 8/9/1973  | 161.4060222 |
| 8/10/1973 | 137.6198716 |
| 8/11/1973 | 156.5921584 |
| 8/12/1973 | 167.3525599 |
| 8/13/1973 | 163.9545383 |
| 8/14/1973 | 166.7862229 |
| 8/15/1973 | 170.1842445 |

|           |             |
|-----------|-------------|
| 8/16/1973 | 200.7664381 |
| 8/17/1973 | 189.1565313 |
| 8/18/1973 | 138.4693769 |
| 8/19/1973 | 122.3287747 |
| 8/20/1973 | 146.1149254 |
| 8/21/1973 | 167.0693914 |
| 8/22/1973 | 142.4337354 |
| 8/23/1973 | 128.5584808 |
| 8/24/1973 | 133.9386816 |
| 8/25/1973 | 131.6733339 |
| 8/26/1973 | 120.9129324 |
| 8/27/1973 | 104.7723302 |
| 8/28/1973 | 176.9802875 |
| 8/29/1973 | 146.6812623 |
| 8/30/1973 | 148.380273  |
| 8/31/1973 | 79.00400034 |
| 9/1/1973  | 82.1188534  |
| 9/2/1973  | 76.4554842  |
| 9/3/1973  | 75.60597882 |
| 9/4/1973  | 68.52676732 |
| 9/5/1973  | 108.7366886 |
| 9/6/1973  | 83.81786416 |
| 9/7/1973  | 143.0000723 |
| 9/8/1973  | 129.1248178 |
| 9/9/1973  | 113.5505525 |
| 9/10/1973 | 125.1604593 |
| 9/11/1973 | 148.0971046 |
| 9/12/1973 | 152.061463  |
| 9/13/1973 | 56.633692   |
| 9/14/1973 | 55.2178497  |
| 9/15/1973 | 65.97825118 |
| 9/16/1973 | 54.65151278 |
| 9/17/1973 | 210.9605027 |
| 9/18/1973 | 159.7070114 |
| 9/19/1973 | 169.901076  |
| 9/20/1973 | 201.899112  |
| 9/21/1973 | 187.4575205 |
| 9/22/1973 | 179.2456352 |
| 9/23/1973 | 174.1486029 |
| 9/24/1973 | 154.0436422 |
| 9/25/1973 | 186.6080151 |
| 9/26/1973 | 185.4753413 |
| 9/27/1973 | 183.7763305 |

|            |             |
|------------|-------------|
| 9/28/1973  | 186.0416782 |
| 9/29/1973  | 178.6792983 |
| 9/30/1973  | 173.0159291 |
| 10/1/1973  | 42.19210054 |
| 10/2/1973  | 163.9545383 |
| 10/3/1973  | 171.8832552 |
| 10/4/1973  | 182.0773198 |
| 10/5/1973  | 198.217922  |
| 10/6/1973  | 185.1921728 |
| 10/7/1973  | 162.8218645 |
| 10/8/1973  | 158.5743376 |
| 10/9/1973  | 179.8119721 |
| 10/10/1973 | 164.8040437 |
| 10/11/1973 | 155.742653  |
| 10/12/1973 | 153.4773053 |
| 10/13/1973 | 146.6812623 |
| 10/14/1973 | 140.7347246 |
| 10/15/1973 | 177.263456  |
| 10/16/1973 | 139.3188823 |
| 10/17/1973 | 135.9208608 |
| 10/18/1973 | 166.5030545 |
| 10/19/1973 | 158.2911691 |
| 10/20/1973 | 168.2020652 |
| 10/21/1973 | 155.1763161 |
| 10/22/1973 | 163.105033  |
| 10/23/1973 | 163.105033  |
| 10/24/1973 | 163.3882014 |
| 10/25/1973 | 167.0693914 |
| 10/26/1973 | 149.5129469 |
| 10/27/1973 | 148.94661   |
| 10/28/1973 | 143.5664092 |
| 10/29/1973 | 163.3882014 |
| 10/30/1973 | 183.2099936 |
| 10/31/1973 | 207.8456496 |
| 11/1/1973  | 244.0912125 |
| 11/2/1973  | 297.326883  |
| 11/3/1973  | 283.16846   |
| 11/4/1973  | 270.1427108 |
| 11/5/1973  | 269.010037  |
| 11/6/1973  | 252.5862663 |
| 11/7/1973  | 230.7822949 |
| 11/8/1973  | 174.9981083 |
| 11/9/1973  | 187.4575205 |

|            |             |
|------------|-------------|
| 11/10/1973 | 188.0238574 |
| 11/11/1973 | 180.378309  |
| 11/12/1973 | 169.0515706 |
| 11/13/1973 | 216.3407034 |
| 11/14/1973 | 150.3624523 |
| 11/15/1973 | 204.1644597 |
| 11/16/1973 | 245.7902233 |
| 11/17/1973 | 345.4655212 |
| 11/18/1973 | 270.9922162 |
| 11/19/1973 | 221.1545673 |
| 11/20/1973 | 175.2812767 |
| 11/21/1973 | 191.1387105 |
| 11/22/1973 | 187.1743521 |
| 11/23/1973 | 183.2099936 |
| 11/24/1973 | 209.5446604 |
| 11/25/1973 | 216.9070404 |
| 11/26/1973 | 227.3842734 |
| 11/27/1973 | 267.5941947 |
| 11/28/1973 | 274.6734062 |
| 11/29/1973 | 342.6338366 |
| 11/30/1973 | 356.7922596 |
| 12/1/1973  | 297.326883  |
| 12/2/1973  | 294.4951984 |
| 12/3/1973  | 209.5446604 |
| 12/4/1973  | 237.8615064 |
| 12/5/1973  | 254.851614  |
| 12/6/1973  | 487.0497512 |
| 12/7/1973  | 603.1488198 |
| 12/8/1973  | 481.386382  |
| 12/9/1973  | 430.4160592 |
| 12/10/1973 | 656.9508272 |
| 12/11/1973 | 767.3865266 |
| 12/12/1973 | 713.5845192 |
| 12/13/1973 | 588.9903968 |
| 12/14/1973 | 591.8220814 |
| 12/15/1973 | 506.8715434 |
| 12/16/1973 | 467.227959  |
| 12/17/1973 | 379.4457364 |
| 12/18/1973 | 314.3169906 |
| 12/19/1973 | 248.9050763 |
| 12/20/1973 | 351.1288904 |
| 12/21/1973 | 526.6933356 |
| 12/22/1973 | 1724.495921 |



|            |             |
|------------|-------------|
| 12/23/1973 | 1223.287747 |
| 12/24/1973 | 900.4757028 |
| 12/25/1973 | 707.92115   |
| 12/26/1973 | 600.3171352 |
| 12/27/1973 | 1650.872122 |
| 12/28/1973 | 2446.575494 |
| 12/29/1973 | 1962.357428 |
| 12/30/1973 | 1455.485884 |
| 12/31/1973 | 1110.020363 |
| 1/1/1974   | 906.139072  |
| 1/2/1974   | 821.188534  |
| 1/3/1974   | 688.0993578 |
| 1/4/1974   | 625.8022966 |
| 1/5/1974   | 594.653766  |
| 1/6/1974   | 552.178497  |
| 1/7/1974   | 501.2081742 |
| 1/8/1974   | 498.3764896 |
| 1/9/1974   | 430.4160592 |
| 1/10/1974  | 416.2576362 |
| 1/11/1974  | 421.9210054 |
| 1/12/1974  | 441.7427976 |
| 1/13/1974  | 416.2576362 |
| 1/14/1974  | 396.435844  |
| 1/15/1974  | 433.2477438 |
| 1/16/1974  | 430.4160592 |
| 1/17/1974  | 538.020074  |
| 1/18/1974  | 436.0794284 |
| 1/19/1974  | 362.4556288 |
| 1/20/1974  | 368.118998  |
| 1/21/1974  | 382.277421  |
| 1/22/1974  | 433.2477438 |
| 1/23/1974  | 572.0002892 |
| 1/24/1974  | 733.4063114 |
| 1/25/1974  | 750.396419  |
| 1/26/1974  | 645.6240888 |
| 1/27/1974  | 688.0993578 |
| 1/28/1974  | 1435.664092 |
| 1/29/1974  | 1353.545239 |
| 1/30/1974  | 1110.020363 |
| 1/31/1974  | 937.2876026 |
| 2/1/1974   | 914.6341258 |
| 2/2/1974   | 758.8914728 |
| 2/3/1974   | 648.4557734 |

|           |             |
|-----------|-------------|
| 2/4/1974  | 566.33692   |
| 2/5/1974  | 523.861651  |
| 2/6/1974  | 436.0794284 |
| 2/7/1974  | 450.2378514 |
| 2/8/1974  | 444.5744822 |
| 2/9/1974  | 430.4160592 |
| 2/10/1974 | 424.75269   |
| 2/11/1974 | 410.594267  |
| 2/12/1974 | 382.277421  |
| 2/13/1974 | 402.0992132 |
| 2/14/1974 | 419.0893208 |
| 2/15/1974 | 407.7625824 |
| 2/16/1974 | 396.435844  |
| 2/17/1974 | 370.9506826 |
| 2/18/1974 | 362.4556288 |
| 2/19/1974 | 356.7922596 |
| 2/20/1974 | 393.6041594 |
| 2/21/1974 | 376.6140518 |
| 2/22/1974 | 441.7427976 |
| 2/23/1974 | 940.1192872 |
| 2/24/1974 | 974.0995024 |
| 2/25/1974 | 733.4063114 |
| 2/26/1974 | 637.129035  |
| 2/27/1974 | 614.4755582 |
| 2/28/1974 | 560.6735508 |
| 3/1/1974  | 526.6933356 |
| 3/2/1974  | 552.178497  |
| 3/3/1974  | 574.8319738 |
| 3/4/1974  | 557.8418662 |
| 3/5/1974  | 869.3271722 |
| 3/6/1974  | 1152.495632 |
| 3/7/1974  | 1047.723302 |
| 3/8/1974  | 1050.554987 |
| 3/9/1974  | 999.5846638 |
| 3/10/1974 | 787.2083188 |
| 3/11/1974 | 622.970612  |
| 3/12/1974 | 535.1883894 |
| 3/13/1974 | 515.3665972 |
| 3/14/1974 | 413.4259516 |
| 3/15/1974 | 379.4457364 |
| 3/16/1974 | 385.1091056 |
| 3/17/1974 | 733.4063114 |
| 3/18/1974 | 710.7528346 |

|           |             |
|-----------|-------------|
| 3/19/1974 | 580.495343  |
| 3/20/1974 | 504.0398588 |
| 3/21/1974 | 470.0596436 |
| 3/22/1974 | 546.5151278 |
| 3/23/1974 | 526.6933356 |
| 3/24/1974 | 555.0101816 |
| 3/25/1974 | 555.0101816 |
| 3/26/1974 | 453.069536  |
| 3/27/1974 | 393.6041594 |
| 3/28/1974 | 319.9803598 |
| 3/29/1974 | 226.8179365 |
| 3/30/1974 | 311.485306  |
| 3/31/1974 | 342.6338366 |
| 4/1/1974  | 399.2675286 |
| 4/2/1974  | 470.0596436 |
| 4/3/1974  | 605.9805044 |
| 4/4/1974  | 855.1687492 |
| 4/5/1974  | 1277.089755 |
| 4/6/1974  | 1472.475992 |
| 4/7/1974  | 1245.941224 |
| 4/8/1974  | 1013.743087 |
| 4/9/1974  | 957.1093948 |
| 4/10/1974 | 826.8519032 |
| 4/11/1974 | 722.079573  |
| 4/12/1974 | 937.2876026 |
| 4/13/1974 | 988.2579254 |
| 4/14/1974 | 945.7826564 |
| 4/15/1974 | 1311.06997  |
| 4/16/1974 | 1577.248322 |
| 4/17/1974 | 1124.178786 |
| 4/18/1974 | 914.6341258 |
| 4/19/1974 | 855.1687492 |
| 4/20/1974 | 792.871688  |
| 4/21/1974 | 673.9409348 |
| 4/22/1974 | 642.7924042 |
| 4/23/1974 | 693.762727  |
| 4/24/1974 | 829.6835878 |
| 4/25/1974 | 818.3568494 |
| 4/26/1974 | 662.6141964 |
| 4/27/1974 | 566.33692   |
| 4/28/1974 | 526.6933356 |
| 4/29/1974 | 467.227959  |
| 4/30/1974 | 453.069536  |

|           |             |
|-----------|-------------|
| 5/1/1974  | 492.7131204 |
| 5/2/1974  | 631.4656658 |
| 5/3/1974  | 532.3567048 |
| 5/4/1974  | 538.020074  |
| 5/5/1974  | 521.0299664 |
| 5/6/1974  | 455.9012206 |
| 5/7/1974  | 515.3665972 |
| 5/8/1974  | 586.1587122 |
| 5/9/1974  | 549.3468124 |
| 5/10/1974 | 603.1488198 |
| 5/11/1974 | 739.0696806 |
| 5/12/1974 | 770.2182112 |
| 5/13/1974 | 1353.545239 |
| 5/14/1974 | 1432.832408 |
| 5/15/1974 | 1214.792693 |
| 5/16/1974 | 974.0995024 |
| 5/17/1974 | 860.8321184 |
| 5/18/1974 | 940.1192872 |
| 5/19/1974 | 784.3766342 |
| 5/20/1974 | 668.2775656 |
| 5/21/1974 | 580.495343  |
| 5/22/1974 | 560.6735508 |
| 5/23/1974 | 498.3764896 |
| 5/24/1974 | 487.0497512 |
| 5/25/1974 | 506.8715434 |
| 5/26/1974 | 484.2180666 |
| 5/27/1974 | 390.7724748 |
| 5/28/1974 | 387.9407902 |
| 5/29/1974 | 379.4457364 |
| 5/30/1974 | 368.118998  |
| 5/31/1974 | 351.1288904 |
| 6/1/1974  | 328.4754136 |
| 6/2/1974  | 302.9902522 |
| 6/3/1974  | 286.0001446 |
| 6/4/1974  | 276.9387539 |
| 6/5/1974  | 286.0001446 |
| 6/6/1974  | 281.4694492 |
| 6/7/1974  | 233.897148  |
| 6/8/1974  | 250.8872556 |
| 6/9/1974  | 186.3248467 |
| 6/10/1974 | 177.8297929 |
| 6/11/1974 | 194.2535636 |
| 6/12/1974 | 211.8100081 |

|           |             |
|-----------|-------------|
| 6/13/1974 | 217.4733773 |
| 6/14/1974 | 212.9426819 |
| 6/15/1974 | 192.2713843 |
| 6/16/1974 | 184.3426675 |
| 6/17/1974 | 207.2793127 |
| 6/18/1974 | 291.6635138 |
| 6/19/1974 | 348.2972058 |
| 6/20/1974 | 243.5248756 |
| 6/21/1974 | 236.1624956 |
| 6/22/1974 | 288.8318292 |
| 6/23/1974 | 288.8318292 |
| 6/24/1974 | 197.9347535 |
| 6/25/1974 | 258.2496355 |
| 6/26/1974 | 269.8595424 |
| 6/27/1974 | 286.0001446 |
| 6/28/1974 | 281.4694492 |
| 6/29/1974 | 227.1011049 |
| 6/30/1974 | 218.6060511 |
| 7/1/1974  | 229.9327895 |
| 7/2/1974  | 239.8436856 |
| 7/3/1974  | 866.4954876 |
| 7/4/1974  | 1455.485884 |
| 7/5/1974  | 832.5152724 |
| 7/6/1974  | 858.0004338 |
| 7/7/1974  | 580.495343  |
| 7/8/1974  | 407.7625824 |
| 7/9/1974  | 370.9506826 |
| 7/10/1974 | 263.9130047 |
| 7/11/1974 | 224.2694203 |
| 7/12/1974 | 191.9882159 |
| 7/13/1974 | 215.7743665 |
| 7/14/1974 | 209.8278289 |
| 7/15/1974 | 164.8040437 |
| 7/16/1974 | 213.7921873 |
| 7/17/1974 | 223.1367465 |
| 7/18/1974 | 205.013965  |
| 7/19/1974 | 182.3604882 |
| 7/20/1974 | 167.0693914 |
| 7/21/1974 | 186.0416782 |
| 7/22/1974 | 190.855542  |
| 7/23/1974 | 154.3268107 |
| 7/24/1974 | 171.6000868 |
| 7/25/1974 | 171.6000868 |

|           |             |
|-----------|-------------|
| 7/26/1974 | 162.2555276 |
| 7/27/1974 | 176.9802875 |
| 7/28/1974 | 138.7525454 |
| 7/29/1974 | 180.6614775 |
| 7/30/1974 | 373.7823672 |
| 7/31/1974 | 334.1387828 |
| 8/1/1974  | 248.9050763 |
| 8/2/1974  | 199.3505958 |
| 8/3/1974  | 202.1822804 |
| 8/4/1974  | 183.2099936 |
| 8/5/1974  | 230.7822949 |
| 8/6/1974  | 216.057535  |
| 8/7/1974  | 226.2515995 |
| 8/8/1974  | 191.7050474 |
| 8/9/1974  | 163.6713699 |
| 8/10/1974 | 161.9723591 |
| 8/11/1974 | 150.0792838 |
| 8/12/1974 | 143.0000723 |
| 8/13/1974 | 157.4416638 |
| 8/14/1974 | 161.9723591 |
| 8/15/1974 | 139.6020508 |
| 8/16/1974 | 134.5050185 |
| 8/17/1974 | 140.4515562 |
| 8/18/1974 | 152.3446315 |
| 8/19/1974 | 176.1307821 |
| 8/20/1974 | 161.4060222 |
| 8/21/1974 | 174.4317714 |
| 8/22/1974 | 173.8654344 |
| 8/23/1974 | 148.0971046 |
| 8/24/1974 | 152.061463  |
| 8/25/1974 | 155.4594845 |
| 8/26/1974 | 107.6040148 |
| 8/27/1974 | 179.2456352 |
| 8/28/1974 | 175.5644452 |
| 8/29/1974 | 214.3585242 |
| 8/30/1974 | 283.16846   |
| 8/31/1974 | 277.2219223 |
| 9/1/1974  | 190.5723736 |
| 9/2/1974  | 193.4040582 |
| 9/3/1974  | 224.2694203 |
| 9/4/1974  | 588.9903968 |
| 9/5/1974  | 444.5744822 |
| 9/6/1974  | 331.3070982 |

|            |             |
|------------|-------------|
| 9/7/1974   | 265.8951839 |
| 9/8/1974   | 208.695155  |
| 9/9/1974   | 215.2080296 |
| 9/10/1974  | 220.8713988 |
| 9/11/1974  | 215.4911981 |
| 9/12/1974  | 219.4555565 |
| 9/13/1974  | 232.4813057 |
| 9/14/1974  | 379.4457364 |
| 9/15/1974  | 356.7922596 |
| 9/16/1974  | 294.4951984 |
| 9/17/1974  | 247.7724025 |
| 9/18/1974  | 267.5941947 |
| 9/19/1974  | 286.0001446 |
| 9/20/1974  | 249.4714133 |
| 9/21/1974  | 257.9664671 |
| 9/22/1974  | 421.9210054 |
| 9/23/1974  | 370.9506826 |
| 9/24/1974  | 353.960575  |
| 9/25/1974  | 297.326883  |
| 9/26/1974  | 272.1248901 |
| 9/27/1974  | 246.3565602 |
| 9/28/1974  | 251.7367609 |
| 9/29/1974  | 288.8318292 |
| 9/30/1974  | 430.4160592 |
| 10/1/1974  | 407.7625824 |
| 10/2/1974  | 351.1288904 |
| 10/3/1974  | 328.4754136 |
| 10/4/1974  | 305.8219368 |
| 10/5/1974  | 294.4951984 |
| 10/6/1974  | 266.1783524 |
| 10/7/1974  | 257.9664671 |
| 10/8/1974  | 249.7545817 |
| 10/9/1974  | 244.374381  |
| 10/10/1974 | 243.8080441 |
| 10/11/1974 | 224.2694203 |
| 10/12/1974 | 213.5090188 |
| 10/13/1974 | 198.5010905 |
| 10/14/1974 | 196.2357428 |
| 10/15/1974 | 218.6060511 |
| 10/16/1974 | 280.9031123 |
| 10/17/1974 | 322.8120444 |
| 10/18/1974 | 311.485306  |
| 10/19/1974 | 294.4951984 |

|            |             |
|------------|-------------|
| 10/20/1974 | 264.1961732 |
| 10/21/1974 | 219.738725  |
| 10/22/1974 | 256.8337932 |
| 10/23/1974 | 241.2595279 |
| 10/24/1974 | 244.6575494 |
| 10/25/1974 | 240.4100225 |
| 10/26/1974 | 230.7822949 |
| 10/27/1974 | 214.3585242 |
| 10/28/1974 | 189.4396997 |
| 10/29/1974 | 208.4119866 |
| 10/30/1974 | 224.8357572 |
| 10/31/1974 | 198.217922  |
| 11/1/1974  | 210.3941658 |
| 11/2/1974  | 195.9525743 |
| 11/3/1974  | 173.8654344 |
| 11/4/1974  | 187.1743521 |
| 11/5/1974  | 269.5763739 |
| 11/6/1974  | 489.8814358 |
| 11/7/1974  | 419.0893208 |
| 11/8/1974  | 407.7625824 |
| 11/9/1974  | 336.9704674 |
| 11/10/1974 | 302.9902522 |
| 11/11/1974 | 281.4694492 |
| 11/12/1974 | 241.8258648 |
| 11/13/1974 | 594.653766  |
| 11/14/1974 | 716.4162038 |
| 11/15/1974 | 577.6636584 |
| 11/16/1974 | 543.6834432 |
| 11/17/1974 | 475.7230128 |
| 11/18/1974 | 404.9308978 |
| 11/19/1974 | 390.7724748 |
| 11/20/1974 | 410.594267  |
| 11/21/1974 | 835.346957  |
| 11/22/1974 | 1118.515417 |
| 11/23/1974 | 804.1984264 |
| 11/24/1974 | 639.9607196 |
| 11/25/1974 | 693.762727  |
| 11/26/1974 | 781.5449496 |
| 11/27/1974 | 586.1587122 |
| 11/28/1974 | 521.0299664 |
| 11/29/1974 | 509.703228  |
| 11/30/1974 | 470.0596436 |
| 12/1/1974  | 441.7427976 |



|            |             |
|------------|-------------|
| 12/2/1974  | 314.3169906 |
| 12/3/1974  | 580.495343  |
| 12/4/1974  | 546.5151278 |
| 12/5/1974  | 509.703228  |
| 12/6/1974  | 515.3665972 |
| 12/7/1974  | 430.4160592 |
| 12/8/1974  | 416.2576362 |
| 12/9/1974  | 1013.743087 |
| 12/10/1974 | 1430.000723 |
| 12/11/1974 | 1044.891617 |
| 12/12/1974 | 866.4954876 |
| 12/13/1974 | 750.396419  |
| 12/14/1974 | 705.0894654 |
| 12/15/1974 | 631.4656658 |
| 12/16/1974 | 518.1982818 |
| 12/17/1974 | 526.6933356 |
| 12/18/1974 | 574.8319738 |
| 12/19/1974 | 495.544805  |
| 12/20/1974 | 416.2576362 |
| 12/21/1974 | 472.8913282 |
| 12/22/1974 | 438.911113  |
| 12/23/1974 | 379.4457364 |
| 12/24/1974 | 399.2675286 |
| 12/25/1974 | 404.9308978 |
| 12/26/1974 | 359.6239442 |
| 12/27/1974 | 382.277421  |
| 12/28/1974 | 399.2675286 |
| 12/29/1974 | 373.7823672 |
| 12/30/1974 | 311.485306  |
| 12/31/1974 | 362.4556288 |
| 1/1/1975   | 382.277421  |
| 1/2/1975   | 379.4457364 |
| 1/3/1975   | 362.4556288 |
| 1/4/1975   | 348.2972058 |
| 1/5/1975   | 348.2972058 |
| 1/6/1975   | 317.1486752 |
| 1/7/1975   | 339.802152  |
| 1/8/1975   | 382.277421  |
| 1/9/1975   | 396.435844  |
| 1/10/1975  | 543.6834432 |
| 1/11/1975  | 688.0993578 |
| 1/12/1975  | 1197.802586 |
| 1/13/1975  | 1036.396564 |

|           |             |
|-----------|-------------|
| 1/14/1975 | 812.6934802 |
| 1/15/1975 | 682.4359886 |
| 1/16/1975 | 560.6735508 |
| 1/17/1975 | 475.7230128 |
| 1/18/1975 | 416.2576362 |
| 1/19/1975 | 410.594267  |
| 1/20/1975 | 529.5250202 |
| 1/21/1975 | 461.5645898 |
| 1/22/1975 | 413.4259516 |
| 1/23/1975 | 373.7823672 |
| 1/24/1975 | 427.5843746 |
| 1/25/1975 | 436.0794284 |
| 1/26/1975 | 583.3270276 |
| 1/27/1975 | 665.445881  |
| 1/28/1975 | 563.5052354 |
| 1/29/1975 | 523.861651  |
| 1/30/1975 | 874.9905414 |
| 1/31/1975 | 804.1984264 |
| 2/1/1975  | 656.9508272 |
| 2/2/1975  | 605.9805044 |
| 2/3/1975  | 472.8913282 |
| 2/4/1975  | 441.7427976 |
| 2/5/1975  | 365.2873134 |
| 2/6/1975  | 328.4754136 |
| 2/7/1975  | 373.7823672 |
| 2/8/1975  | 396.435844  |
| 2/9/1975  | 379.4457364 |
| 2/10/1975 | 345.4655212 |
| 2/11/1975 | 339.802152  |
| 2/12/1975 | 331.3070982 |
| 2/13/1975 | 302.9902522 |
| 2/14/1975 | 300.1585676 |
| 2/15/1975 | 297.326883  |
| 2/16/1975 | 319.9803598 |
| 2/17/1975 | 328.4754136 |
| 2/18/1975 | 353.960575  |
| 2/19/1975 | 359.6239442 |
| 2/20/1975 | 370.9506826 |
| 2/21/1975 | 373.7823672 |
| 2/22/1975 | 368.118998  |
| 2/23/1975 | 385.1091056 |
| 2/24/1975 | 668.2775656 |
| 2/25/1975 | 2027.486174 |

|           |             |
|-----------|-------------|
| 2/26/1975 | 1718.832552 |
| 2/27/1975 | 1211.961009 |
| 2/28/1975 | 934.455918  |
| 3/1/1975  | 770.2182112 |
| 3/2/1975  | 679.604304  |
| 3/3/1975  | 605.9805044 |
| 3/4/1975  | 538.020074  |
| 3/5/1975  | 515.3665972 |
| 3/6/1975  | 515.3665972 |
| 3/7/1975  | 487.0497512 |
| 3/8/1975  | 521.0299664 |
| 3/9/1975  | 515.3665972 |
| 3/10/1975 | 447.4061668 |
| 3/11/1975 | 419.0893208 |
| 3/12/1975 | 419.0893208 |
| 3/13/1975 | 438.911113  |
| 3/14/1975 | 455.9012206 |
| 3/15/1975 | 430.4160592 |
| 3/16/1975 | 402.0992132 |
| 3/17/1975 | 393.6041594 |
| 3/18/1975 | 430.4160592 |
| 3/19/1975 | 478.5546974 |
| 3/20/1975 | 959.9410794 |
| 3/21/1975 | 1812.278144 |
| 3/22/1975 | 1172.317424 |
| 3/23/1975 | 1008.079718 |
| 3/24/1975 | 957.1093948 |
| 3/25/1975 | 988.2579254 |
| 3/26/1975 | 1090.198571 |
| 3/27/1975 | 900.4757028 |
| 3/28/1975 | 696.5944116 |
| 3/29/1975 | 583.3270276 |
| 3/30/1975 | 600.3171352 |
| 3/31/1975 | 557.8418662 |
| 4/1/1975  | 526.6933356 |
| 4/2/1975  | 447.4061668 |
| 4/3/1975  | 620.1389274 |
| 4/4/1975  | 1631.05033  |
| 4/5/1975  | 1047.723302 |
| 4/6/1975  | 804.1984264 |
| 4/7/1975  | 628.6339812 |
| 4/8/1975  | 566.33692   |
| 4/9/1975  | 526.6933356 |

|           |             |
|-----------|-------------|
| 4/10/1975 | 453.069536  |
| 4/11/1975 | 464.3962744 |
| 4/12/1975 | 526.6933356 |
| 4/13/1975 | 475.7230128 |
| 4/14/1975 | 430.4160592 |
| 4/15/1975 | 450.2378514 |
| 4/16/1975 | 461.5645898 |
| 4/17/1975 | 382.277421  |
| 4/18/1975 | 523.861651  |
| 4/19/1975 | 744.7330498 |
| 4/20/1975 | 1112.852048 |
| 4/21/1975 | 1067.545094 |
| 4/22/1975 | 852.3370646 |
| 4/23/1975 | 727.7429422 |
| 4/24/1975 | 832.5152724 |
| 4/25/1975 | 1155.327317 |
| 4/26/1975 | 1104.356994 |
| 4/27/1975 | 957.1093948 |
| 4/28/1975 | 829.6835878 |
| 4/29/1975 | 739.0696806 |
| 4/30/1975 | 642.7924042 |
| 5/1/1975  | 637.129035  |
| 5/2/1975  | 724.9112576 |
| 5/3/1975  | 815.5251648 |
| 5/4/1975  | 767.3865266 |
| 5/5/1975  | 971.2678178 |
| 5/6/1975  | 1008.079718 |
| 5/7/1975  | 1030.733194 |
| 5/8/1975  | 976.931187  |
| 5/9/1975  | 852.3370646 |
| 5/10/1975 | 747.5647344 |
| 5/11/1975 | 625.8022966 |
| 5/12/1975 | 526.6933356 |
| 5/13/1975 | 659.7825118 |
| 5/14/1975 | 651.287458  |
| 5/15/1975 | 572.0002892 |
| 5/16/1975 | 489.8814358 |
| 5/17/1975 | 574.8319738 |
| 5/18/1975 | 481.386382  |
| 5/19/1975 | 427.5843746 |
| 5/20/1975 | 444.5744822 |
| 5/21/1975 | 430.4160592 |
| 5/22/1975 | 362.4556288 |

|           |             |
|-----------|-------------|
| 5/23/1975 | 362.4556288 |
| 5/24/1975 | 393.6041594 |
| 5/25/1975 | 353.960575  |
| 5/26/1975 | 238.4278433 |
| 5/27/1975 | 280.9031123 |
| 5/28/1975 | 286.0001446 |
| 5/29/1975 | 297.326883  |
| 5/30/1975 | 278.0714277 |
| 5/31/1975 | 286.0001446 |
